# Supplementary material
Source: publisher figshare collection journal article supplement (https://acs.figshare.com/ndownloader/files/4192804)
Supplement: Supplementary file 1 [file 4192804]

# **Heterogeneous Asymmetric Hydrogenation of Activated Ketones: Mechanistic Insight into the Role of Alcohol Products by in situ Modulation-Excitation IR Spectroscopy**

Nobutaka Maeda\*, Shogo Sano, Tamas Mallat, Konrad Hungerbühler, Alfons Baiker\*

Institute for Chemical and Bioengineering, Department of Chemistry and Applied Biosciences, ETH Zurich, Hönggerberg, HCI, CH-8093 Zurich, Switzerland

\* Corresponding authors: [nobutaka.maeda@chem.ethz.ch](mailto:nobutaka.maeda@chem.ethz.ch), [alfons.baiker@chem.ethz.ch](mailto:alfons.baiker@chem.ethz.ch)

## **Supporting Information**

## Transient adsorption-desorption behavior of product alcohols on unmodified and CD-modified Pt/Al<sub>2</sub>O<sub>3</sub>

Figures S1, S2 and S3 show phase-domain and time-domain in situ ATR-IR spectra during transient adsorption-desorption of chiral product alcohols, (*R*)-PL, (*R*)-TFBA and (*R*)-EL, on CD-modified Pt/Al<sub>2</sub>O<sub>3</sub>, unmodified Pt/Al<sub>2</sub>O<sub>3</sub> and ZnSe IRE crystal (blank test) at 283 K. To extract kinetic information for Figure 2, the peak of the absorption band assignable to C=O stretching vibration at around 1750 cm<sup>-1</sup> was selected for (*R*)-PL and (*R*)-EL while CF<sub>3</sub> deformation mode at around 1180 cm<sup>-1</sup> was used for (*R*)-TFBA profile.

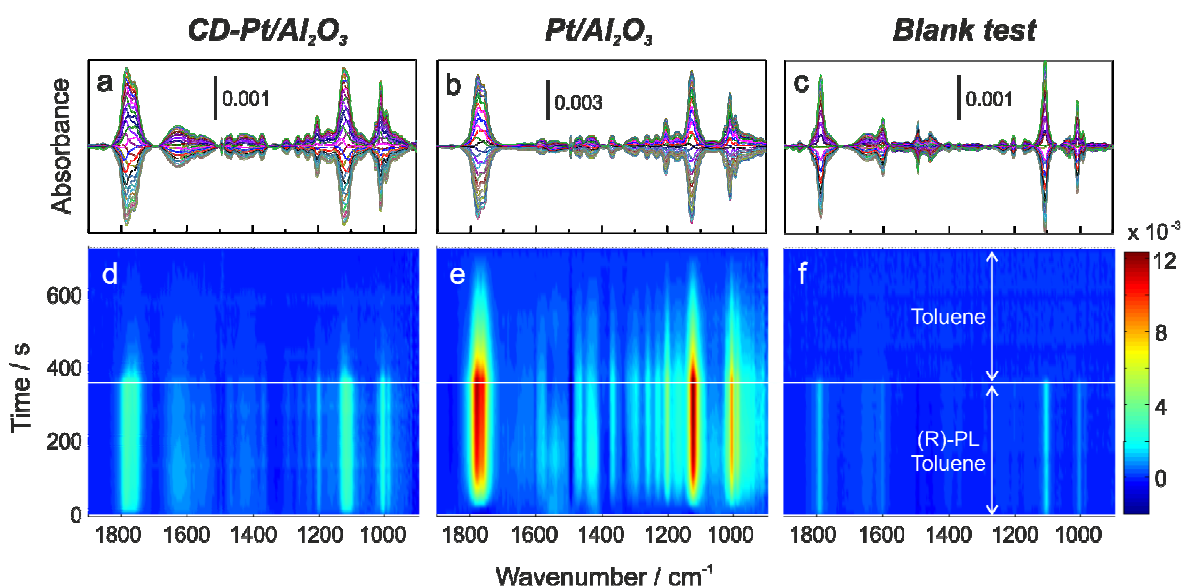

**Figure S1.** (a-c) phase-domain and (d-f) time-domain ATR-IR spectra of (*R*)-PL acquired from MES experiments by periodically changing between a 1 mM solution of (*R*)-PL in H<sub>2</sub>-saturated toluene (0 – 375 s) and H<sub>2</sub>-saturated toluene (375 – 750 s) on (a, d) CD-modified Pt/Al<sub>2</sub>O<sub>3</sub>, (b, e) Pt/Al<sub>2</sub>O<sub>3</sub> and (c, f) ZnSe at 283 K. The last spectrum of the period at 750 s was used as the background.

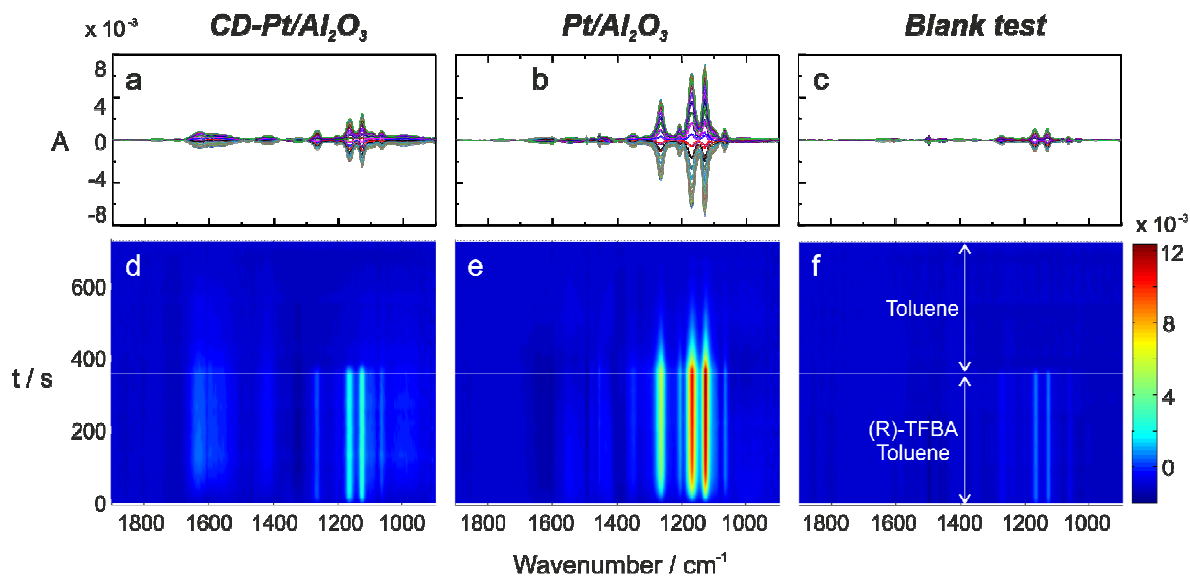

**Figure S2.** (a-c) phase-domain and (d-f) time-domain ATR-IR spectra of (R)-TFBA acquired from MES experiments using periodic changes between a 1 mM solution of (R)-TFBA in H<sub>2</sub>-saturated toluene (0 – 375 s) and H<sub>2</sub>-saturated toluene (375 – 750 s) on (a, d) CD-modified Pt/Al<sub>2</sub>O<sub>3</sub>, (b, e) Pt/Al<sub>2</sub>O<sub>3</sub> and (c, f) ZnSe at 283 K. The last spectrum of the period at 750 s was used as the background.

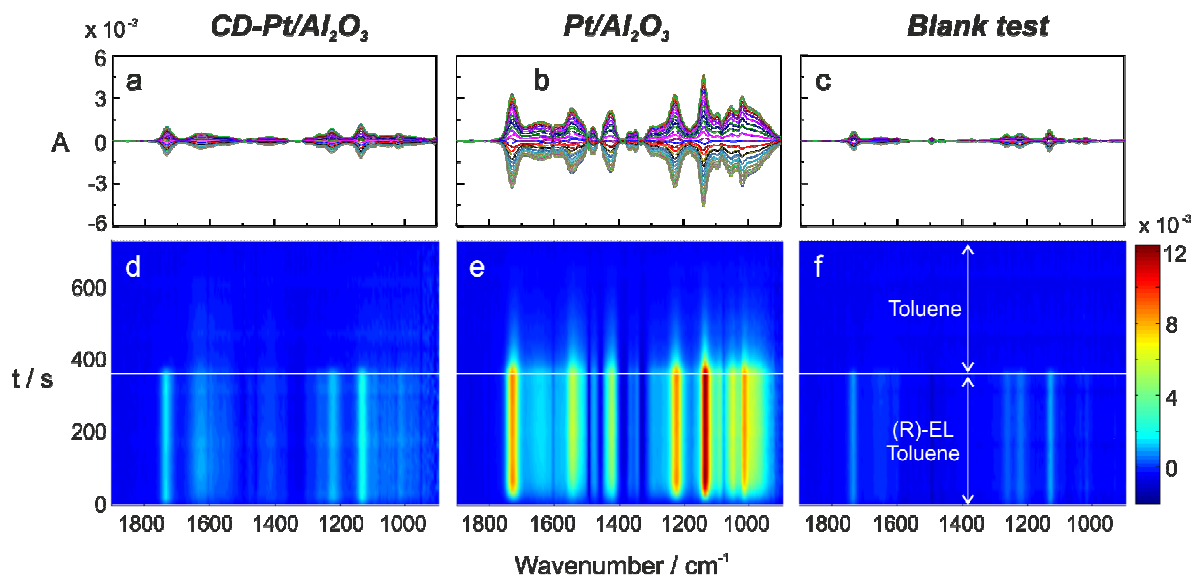

**Figure S3.** (a-c) phase-domain and (d-f) time-domain ATR-IR spectra of (*R*)-EL acquired from MES experiments using periodic changes between a 1 mM solution of (*R*)-EL in H<sub>2</sub>-saturated toluene (0 – 375 s) and H<sub>2</sub>-saturated toluene (375 – 750 s) on (a, d) CD-modified Pt/Al<sub>2</sub>O<sub>3</sub>, (b, e) Pt/Al<sub>2</sub>O<sub>3</sub> and (c, f) ZnSe at 283 K. The last spectrum of the period at 750 s was used as the background.
